# Supplementary material for: Study of Biocrudes Obtained via Hydrothermal Liquefaction (HTL) of Wild Alga Consortium under Different Conditions
Source: MDPI journal article supplement (doi:10.3390/pr9091494), 2021-08-25
Supplement: s1 [file s1]

# Supplementals Datas

## Study of the biocrudes obtained via Hydrothermal Liquefaction (HTL) by wild algae consortium under different conditions

Caroline Barrère-Mangote <sup>1,2,\*</sup>, Anne Roubaud <sup>3,\*</sup>, Brice Bouyssiere <sup>4,\*</sup>, Julien Maillard <sup>2,5</sup>, Jasmine Hertzog <sup>2,5</sup>, Johann Le Maître <sup>1,2,5</sup>, Marie Hubert-Roux <sup>2,5</sup>, Jean Francois Sassi <sup>6</sup>, Carlos Afonso <sup>2,5,\*</sup> and Pierre Giusti <sup>1,2</sup>

<sup>1</sup> TOTAL Refining and Chemicals, Total Research and Technologies Gonfreville, BP 27, 76700 Harfleur, France; johann.lemaitre@yahoo.com (J.L.M.); pierre.giusti@total.com (P.G.)

<sup>2</sup> International Joint Laboratory–iC2MC: Complex Matrices Molecular Characterization, TRTG, BP 27, 76700 Harfleur, France; julien.maillard@univ-rouen.fr (J.M.); jasmine.hertzog@external.total.com (J.H.); marie.hubert@univ-rouen.fr (M.H.-R.)

<sup>3</sup> CEA LITEN, Université Grenoble Alpes, 38 000 Grenoble, France

<sup>4</sup> E2S UPPA, CNRS, IPREM, Institut des Sciences Analytiques et de Physico-Chimie Pour l'Environnement et les Matériaux, Université de Pau et des Pays de l'Adour, UMR5254, Hélioparc, 64053 Pau, France

<sup>5</sup> COBRA, UMR 6014 et FR 3038, INSA de Rouen, CNRS, IRCOF, Normandie Université, Université de Rouen, CEDEX, 76821 Mont Saint Aignan, France

<sup>6</sup> CEA de Cadarache, 13108 St Paul Lez Durance, France, Jean-Francois.SASSI@cea.fr (J.F.S)

\* Correspondence: [caroline.mangote@total.com](mailto:caroline.mangote@total.com) (C.B.-M.); [anne.roubaud@cea.fr](mailto:anne.roubaud@cea.fr) (A.R.); [brice.bouyssiere@univ-pau.fr](mailto:brice.bouyssiere@univ-pau.fr) (B.B.); [afonscar@univ-rouen.fr](mailto:afonscar@univ-rouen.fr) (C.A.); Tel.: +33-(0)-235-551-102 (C.B.-M.); +33-(0)-438-780-454 (A.R.); +33-(0)-559-407-752 (B.B.); +33-(0)-235-522-940 (C.A.)

### CORRESPONDING AUTHOR

Caroline Mangote

Tel: +33 (0) 235 551 102

Email: [caroline.mangote@total.com](mailto:caroline.mangote@total.com)

Anne Roubaud

Tel: +33 (0) 4 38 78 04 54

Email: [anne.roubaud@cea.fr](mailto:anne.roubaud@cea.fr)

Brice Bouyssiere

Tel: +33 (0) 559 407 752

Email: [brice.bouyssiere@univ-pau.fr](mailto:brice.bouyssiere@univ-pau.fr)

Carlos Afonso

Tel: +33 2 35 52 29 40

Email: [afonscar@univ-rouen.fr](mailto:afonscar@univ-rouen.fr)

### LDI FTICR MS characterization of bio-oils

**Sample Preparation.** Samples were solubilized in toluene and further diluted in methanol/toluene (50/50 v/v) to a final concentration of  $10^{-5}$  mg.mL<sup>-1</sup> for Atmospheric Pressure PhotoIonization (APPI) and 5 mg.mL<sup>-1</sup> for Laser Desorption Ionization (LDI).

**Instrumentation.** A hybrid quadrupole FTICR instrument (Solarix XR, Bruker Daltonics, Bremen, Germany) equipped with a 12 T superconducting magnet was operated in the positive laser desorption ionization. For LDI analysis, mass spectra were acquired over a mass range of  $m/z$  110-1,300 for 200 scans for broadband experiments. The signal was digitalized with 8 M points resulting in a transient length of 3.4 s. The experimental conditions were set as follows: Octopole energy, 350 Vpp ; quadrupole lower cut-off ,  $m/z$  150; quadrupole collision energy, 1200 Vpp ; TOF duration, 0.75 ms. Each LDI mass spectrum for each position is the result of 200 consecutive laser shots for a laser power of 18%.

Mass spectrometers were externally  $m/z$  calibrated using sodium trifluoroacetate solution before sample analyses. Instrument control and data acquisition were provided by DataAnalysis (version 5.0). CERES (self-developed Matlab-based interface) and OriginPro (version 2016) were used to process and visualize the data sets.

From the molecular formulas determined from the accurate mass measurements (errors typically < 0.2 ppm), the number of double bond equivalents (DBE) values were calculated from Equation 1 (c: carbon number; h: hydrogen number; n: nitrogen number) for a molecule with molecular formula C<sub>c</sub>H<sub>h</sub>N<sub>n</sub>O<sub>s</sub>S<sub>s</sub>. Giving a resolving power of 900 000 at  $m/z$  400, it is possible to separate class N<sub>1</sub> ions from class N<sub>1</sub>S<sub>1</sub> (mass split: 3.4 mDa) compounds.

$$DBE = c - \frac{h}{2} + \frac{n}{2} + 1$$

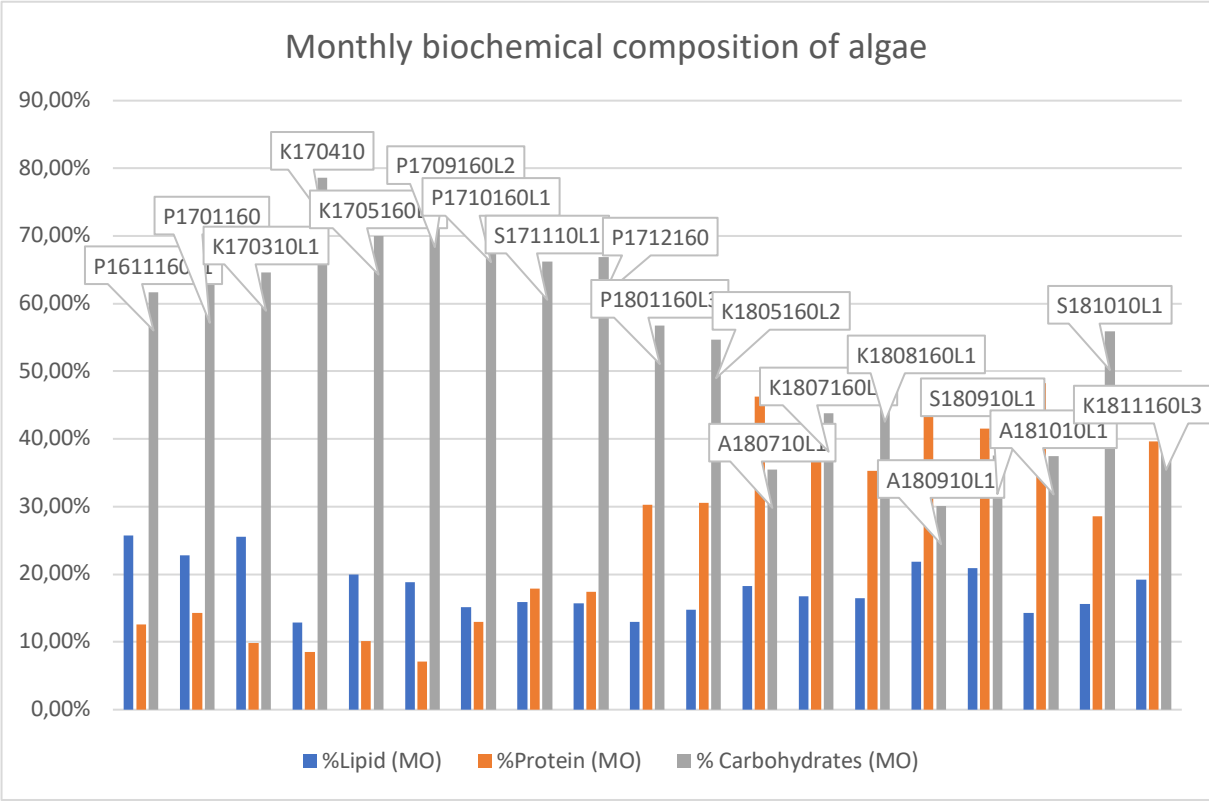

**Figure S1.** Variation of the biochemical composition of algae batches along the project

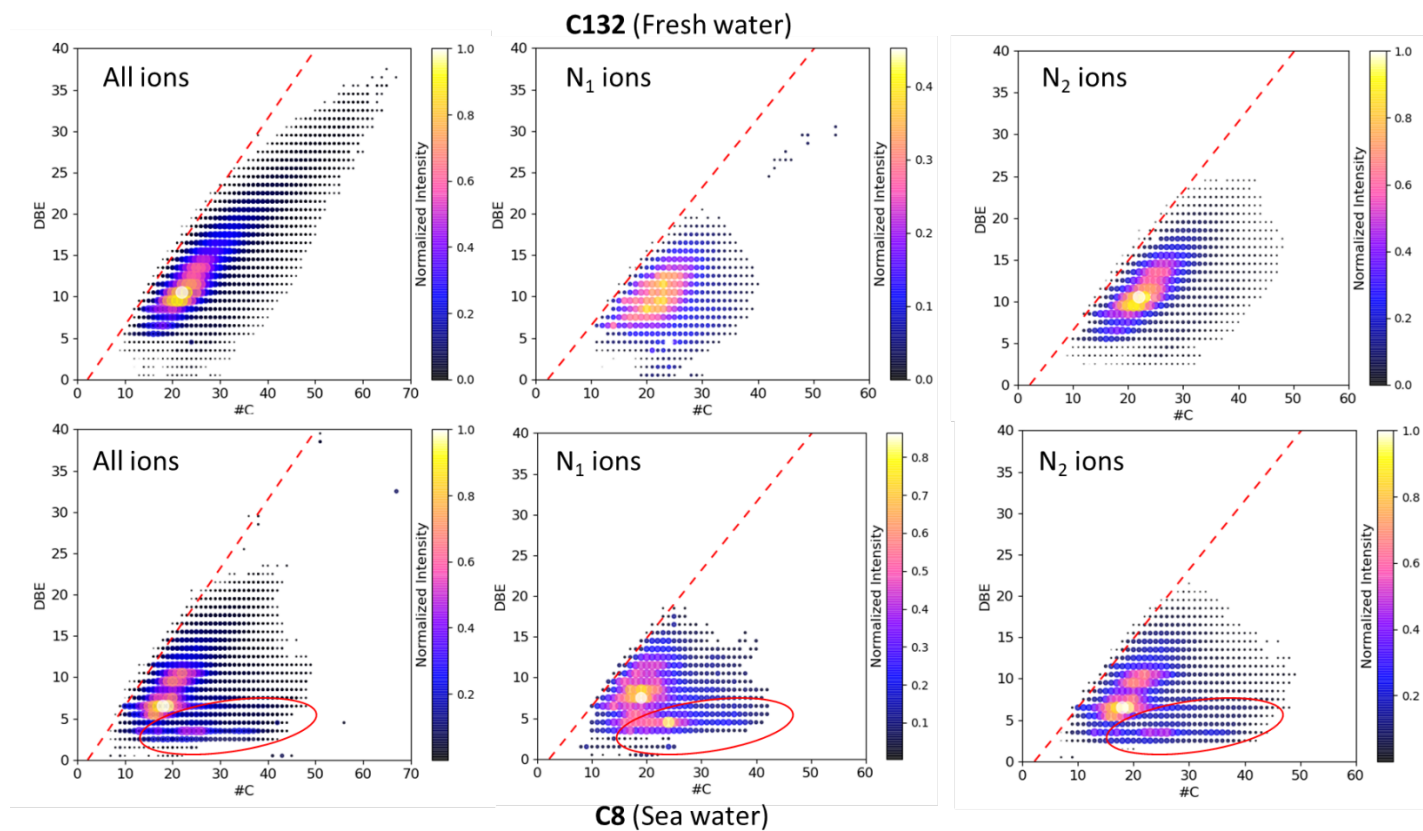

**Figure S2.** FTICR-MS analysis of two different bio oil C8 and C13-2, respectively coming from sea and freshwater. classes of molecules containing 1 or 2 nitrogen atom ( $N_1$  and  $N_2$ ) have been represented in DBE vs C number.

a)

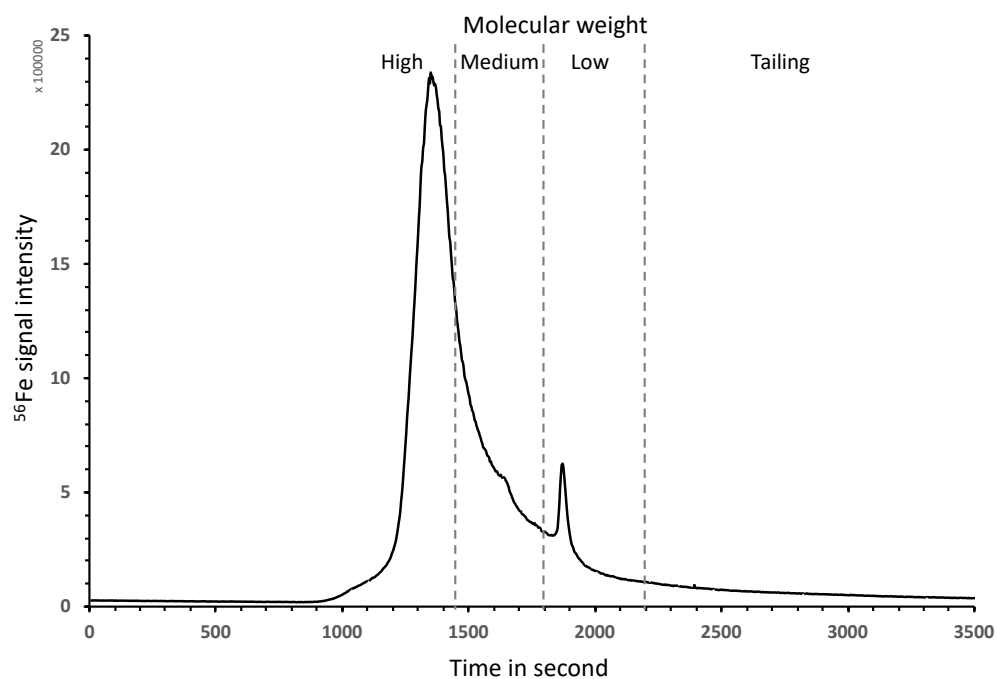

b)

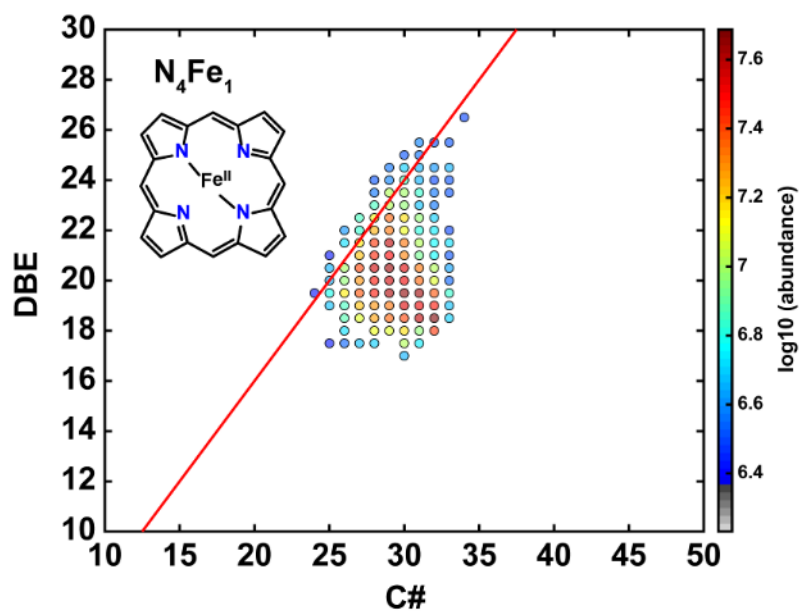

**Figure S3.** GPC ICP MS a) and DBE/C# map for  $N_4Fe_1$  class detected in LDI+, in the C13-1 bio-oil sample b).
